# Supplementary material for: Toxic elements in benthic lacustrine sediments of Utah’s Great Salt Lake following a historic low in elevation
Source: Frontiers journal article supplement (doi:10.3389/fsoil.2024.1445792), 2024-09-13
Supplement: Table_1.XLSX [file Table_1.XLSX]

## Sheet: TableS1
Element	Subset	Fixed Effect	Chisq	df	P	Significance
Cu	all	site	7.7739	5	0.1691	ns
		season	0.3265	2	0.8494	ns
	EPA 3050b	site	18.7405	5	0.002148	**
		season	0.8251	2	0.661964	ns
	NH4AcO pH=7	site	25.324	5	0.0001206	***
		season	16.486	2	0.0002632	***
Tl	all	site	13.6966	5	0.01766	*
		season	8.6345	2	0.01334	*
	EPA 3050b	site	61.637	5	5.574e-12	***
		season	15.382	2	0.000457	***
	NH4AcO pH=7	site	62.402	5	3.872e-12	***
		season	31.311	2	1.588e-07	***
As	all	site	131.587	5	<2e-16	***
		season	3.621	2	0.1635	ns
	EPA 3050b	site	307.574	5	<2e-16	***
		season	0.726	2	0.6955	ns
	NH4AcO pH=7	site	122.07	5	< 2.2e-16	***
		season	14.486	2	0.0007151	***
Hg	NH4AcO pH=7	site	9.814	5	0.08067	.
		season	232.784	2	< 2e-16	***
Pb	all	site	66.367	5	5.831e-13	***
		season	4.047	2	0.1322	ns
	EPA 3050b	site	38.363	5	3.19e-07	***
		season	1.122	2	0.5707	ns
	NH4AcO pH=7	site	133.199	5	< 2.2e-16	***
		season	10.597	2	0.004999	**
Zn	all	site	21.5622	5	0.000634	***
		season	0.5723	2	0.751135	ns
	EPA 3050b	site	20.094	5	0.0012	**
		season	0.1385	2	0.9331	ns
	NH4AcO pH=7	site	44.794	5	1.598e-08	***
		season	34.831	2	2.732e-08	***
Signif. codes: 0 ‘***’ 0.001 ‘**’ 0.01 ‘*’ 0.05 ‘.’ 0.1 ‘ ’ 1
