# Supplementary material for: Toxic elements in benthic lacustrine sediments of Utah’s Great Salt Lake following a historic low in elevation
Source: Frontiers journal article supplement (doi:10.3389/fsoil.2024.1445792), 2024-09-13
Supplement: Table_2.XLSX [file Table_2.XLSX]

## Sheet: raw data
Season	Date sampled	Site	Sample	pH	Salinity of sample (ppt)	ORP	Date processed	Treatment	Cu	Zn	As	Hg	Tl	Pb	Pb	Pb
spring	20210521	1	a	8.57	0.38	30.5	2021-10-07	HN4AcO pH=7 (cations), water (anions)	1.7205	37.1202	1.0777	0.0302153	0.0590688	30.9652	29.6239	30.4532
spring	20210521	1	a	8.57	0.38	30.5	2022-07-28	HN4AcO pH=7 (cations), water (anions)
spring	20210521	1	a	8.57	0.38	30.5	2023-06-26	EPA 3050b	8.70963	54.0873	1.77744		0.167352	28.6701	27.3047	28.2173
spring	20210521	1	b	8.47	0.07	40	2021-10-07	HN4AcO pH=7 (cations), water (anions)	1.67471	35.4197	0.667771	0.0132173	0.0396361	22.9236	22.0194	22.5535
spring	20210521	1	b	8.47	0.07	40	2022-09-29	water
spring	20210521	1	b	8.47	0.07	40	2023-06-26	EPA 3050b	14.6996	85.0354	3.18759		0.192862	51.6577	49.0542	50.6103
spring	20210521	1	c	8.48	0.1	-3.5	2021-10-07	HN4AcO pH=7 (cations), water (anions)	2.48478	33.1859	0.800948	0.0157679	0.0405155	14.0162	13.3841	13.801
spring	20210521	1	c	8.48	0.1	-3.5	2022-09-29	water
spring	20210521	2	a	8.62	0.06	-68.7	2021-10-07	HN4AcO pH=7 (cations), water (anions)	3.81451	55.4706	0.74028	0.0202333	0.0682513	38.4597	36.7458	37.7587
spring	20210521	2	a	8.62	0.06	-68.7	2022-09-29	water
spring	20210521	2	a	8.62	0.06	-68.7	2023-06-26	EPA 3050b	32.7065	145.53	6.03523		0.294366	92.2583	88.0682	90.6822
spring	20210521	2	b	8.58	0.03	-64.4	2021-10-07	HN4AcO pH=7 (cations), water (anions)	2.26391	40.7329	1.02933	0.0101131	0.0670308	40.4233	38.6407	39.6965
spring	20210521	2	b	8.58	0.03	-64.4	2022-09-29	water
spring	20210521	2	b	8.58	0.03	-64.4	2023-06-26	EPA 3050b	17.0066	96.5873	3.67506		0.182189	48.604	46.2803	47.8375
spring	20210521	2	c	8.61	0.04	-205.8	2021-10-07	HN4AcO pH=7 (cations), water (anions)	3.03873	48.7159	1.40934	0.0104733	0.0892497	42.4502	40.3905	41.5359
spring	20210521	2	c	8.61	0.04	-205.8	2022-09-29	water
spring	20210526	3	a	8.85	1.03	82.6	2021-10-07	HN4AcO pH=7 (cations), water (anions)	11.512	33.5437	9.56701	0.0111413	0.137997	342.978	330.241	348.418
spring	20210526	3	a	8.85	1.03	82.6	2022-09-29	water
spring	20210526	3	a	8.85	1.03	82.6	2023-06-26	EPA 3050b	44.5191	233.108	10.2866		0.453913	175.908	167.864	173.284
spring	20210526	3	b	8.66	0.84	68.1	2021-10-07	HN4AcO pH=7 (cations), water (anions)	2.37156	16.5173	2.56905	0.006	0.0695996	62.541	60.0519	61.6284
spring	20210526	3	b	8.66	0.84	68.1	2022-09-29	water
spring	20210526	3	b	8.66	0.84	68.1	2023-06-26	EPA 3050b	14.9377	77.8531	7.1489		0.212211	78.2142	74.9376	77.0513
spring	20210526	3	c	9.4	1.01	72.1	2021-10-07	HN4AcO pH=7 (cations), water (anions)	1.03673	7.27212	2.80886	0.005	0.0954429	75.9888	73.0902	74.985
spring	20210526	3	c	9.4	1.01	72.1	2022-07-28	HN4AcO pH=7 (cations), water (anions)
spring	20210503	4	a	8.7	12.52	49.2	2021-10-07	HN4AcO pH=7 (cations), water (anions)	0.5	19.1534	17.9445	0.00748725	0.201407	5.22924	4.71884	4.98462
spring	20210503	4	a	8.7	12.52	49.2	2022-09-29	water
spring	20210503	4	a	8.7	12.52	49.2	2023-06-26	EPA 3050b	21.6958	113.546	55.7097		1.32621	27.8073	25.4751	26.7983
spring	20210503	4	b	8.88	7.72	-163.1	2021-10-07	HN4AcO pH=7 (cations), water (anions)	1.00043	8.38145	8.11771	0.00637014	0.0416856	3.34924	3.09508	3.23512
spring	20210503	4	b	8.88	7.72	-163.1	2022-09-29	water
spring	20210503	4	b	8.88	7.72	-163.1	2023-06-26	EPA 3050b	11.3718	59.6833	34.5419		0.791631	13.4447	12.2658	12.911
spring	20210503	4	c	8.89	7.49	60.3	2021-10-07	HN4AcO pH=7 (cations), water (anions)	0.3	8.59753	7.54311	0.004	0.0495551	3.74052	3.4182	3.57534
spring	20210503	4	c	8.89	7.49	60.3	2022-09-29	water
spring	20210503	5	a	9.11	5.18	-88.9	2021-10-07	HN4AcO pH=7 (cations), water (anions)	0.326294	4.99641	1.36577	0.00463789	0.0326846	1.34432	1.26039	1.31313
spring	20210503	5	a	9.11	5.18	-88.9	2022-09-29	water
spring	20210503	5	a	9.11	5.18	-88.9	2023-06-26	EPA 3050b	11.1548	41.137	16.8838		0.568507	26.992	25.5326	26.2708
spring	20210503	5	b	9.19	6.33	9.6	2021-10-07	HN4AcO pH=7 (cations), water (anions)	0.383273	4.42916	1.83969	0.004	0.0152898	1.32513	1.25032	1.28593
spring	20210503	5	b	9.19	6.33	9.6	2022-09-29	water
spring	20210503	5	b	9.19	6.33	9.6	2023-06-26	EPA 3050b	5.13445	18.2797	9.86998		0.2611	11.8916	11.1336	11.5368
spring	20210503	6	a	8.7	13.46	-41.4	2021-10-07	HN4AcO pH=7 (cations), water (anions)	2.91402	7.10565	7.08868	0.00511657	0.0871062	7.55617	7.17962	7.42041
spring	20210503	6	a	8.7	13.46	-41.4	2022-09-29	water
spring	20210503	6	a	8.7	13.46	-41.4	2023-06-26	EPA 3050b	48.9547	152.104	51.353		0.26011	70.4398	67.0154	69.356
spring	20210503	6	b	8.83	13.95	-194.9	2021-10-07	HN4AcO pH=7 (cations), water (anions)	8.74279	13.7105	39.1366	0.007	0.397727	8.8798	8.42839	8.69138
spring	20210503	6	b	8.83	13.95	-194.9	2022-09-29	water
spring	20210503	6	b	8.83	13.95	-194.9	2023-06-26	EPA 3050b	24.6406	42.993	22.9626		0.136753	44.9802	42.5998	44.0641
spring	20210503	6	c	8.5	8.19	-252	2021-10-07	HN4AcO pH=7 (cations), water (anions)	3.39125	11.4185	9.84116	0.01	0.126259	9.51073	9.06339	9.31384
spring	20210503	6	c	8.5	8.19	-252	2022-09-29	water
summer	20210722	1	a	8.61	0.04	35.2	2021-10-07	HN4AcO pH=7 (cations), water (anions)	3.01346	37.6264	0.902674	0.009	0.0600021	75.4278	72.1938	74.0869
summer	20210722	1	a	8.61	0.04	35.2	2022-09-29	water
summer	20210722	1	a	8.61	0.04	35.2	2023-06-26	EPA 3050b	22.0522	113.477	3.69587		0.186611	76.0923	72.0495	74.6026
summer	20210722	1	b	7.43	0.12	-71.3	2021-10-07	HN4AcO pH=7 (cations), water (anions)	2.55776	17.3933	0.624184	0.008	0.0415952	20.977	20.0071	20.5883
summer	20210722	1	b	7.43	0.12	-71.3	2022-09-29	water
summer	20210722	1	b	7.43	0.12	-71.3	2023-06-26	EPA 3050b	18.564	66.9608	3.48851		0.16128	37.6316	35.7021	36.9461
summer	20210722	1	c	8.67	0.02	33.3	2021-10-07	HN4AcO pH=7 (cations), water (anions)	2.22929	23.3118	1.69301	0.008	0.0326645	34.2383	32.798	33.6316
summer	20210722	1	c	8.67	0.02	33.3	2022-09-29	water
summer	20210722	2	a	8.17	0.09	-50.1	2021-10-07	HN4AcO pH=7 (cations), water (anions)	2.05316	52.0307	1.32385	0.00935269	0.120014	38.1926	36.3329	37.4042
summer	20210722	2	a	8.17	0.09	-50.1	2022-09-29	water
summer	20210722	2	a	8.17	0.09	-50.1	2023-06-26	EPA 3050b	22.5941	115.665	5.33906		0.230174	65.6705	62.9659	64.541
summer	20210722	2	b	8	0.16	-139.7	2021-10-07	HN4AcO pH=7 (cations), water (anions)	2.43431	41.5793	1.14427	0.008	0.0875054	37.462	35.8612	36.7814
summer	20210722	2	b	8	0.16	-139.7	2022-09-29	water
summer	20210722	2	b	8	0.16	-139.7	2023-06-26	EPA 3050b	39.4699	190.454	9.51102		0.401542	130.686	124.406	128.388
summer	20210722	2	c	8.1	0.07	-125.1	2021-10-07	HN4AcO pH=7 (cations), water (anions)	2.14013	32.6989	1.23822	0.008	0.0689964	38.915	37.1952	38.1782
summer	20210722	2	c	8.1	0.07	-125.1	2022-09-29	water
summer	20210803	3	a	8.47	0.25	45.1	2021-10-07	HN4AcO pH=7 (cations), water (anions)	3.90418	49.0288	3.77416	0.008	0.0841128	200.93	193.499	198.408
summer	20210803	3	a	8.47	0.25	45.1	2022-09-29	water
summer	20210803	3	a	8.47	0.25	45.1	2023-06-26	EPA 3050b	27.8725	176.865	7.43458		0.227891	174.85	168.426	173.07
summer	20210803	3	b	7.98	0.21	-80.8	2021-10-07	HN4AcO pH=7 (cations), water (anions)	5.57142	50.9825	2.64667	0.008	0.0719793	73.1489	70.2012	71.9979
summer	20210803	3	b	7.98	0.21	-80.8	2022-09-29	water
summer	20210803	3	b	7.98	0.21	-80.8	2023-06-26	EPA 3050b	15.5656	89.6914	4.08346		0.179741	61.4608	59.0375	60.6671
summer	20210803	3	c	8.14	0.19	24.7	2021-10-07	HN4AcO pH=7 (cations), water (anions)	2.68289	42.5759	2.40119	0.007	0.0569986	50.05	47.99	49.3318
summer	20210803	3	c	8.14	0.19	24.7	2022-09-29	water
summer	20210803	4	a	8.51	16.48	54.2	2021-10-07	HN4AcO pH=7 (cations), water (anions)	2.41168	14.4728	9.9403	0.007	0.0490637	6.6869	6.25287	6.50177
summer	20210803	4	a	8.51	16.48	54.2	2022-09-29	water
summer	20210803	4	a	8.51	16.48	54.2	2023-06-26	EPA 3050b	24.9625	77.7912	41.4875		0.486168	16.1167	14.8594	15.5174
summer	20210803	4	b	8.42	17.96	-51.4	2021-10-07	HN4AcO pH=7 (cations), water (anions)	3.32211	86.6276	23.551	0.00496693	0.020652	2.72041	2.57892	2.67459
summer	20210803	4	b	8.42	17.96	-51.4	2022-09-29	water
summer	20210803	4	b	8.42	17.96	-51.4	2023-06-26	EPA 3050b	21.4254	53.3127	42.7943		0.403052	20.8636	19.7882	20.493
summer	20210803	4	c	8.38	20.34	5.6	2021-10-07	HN4AcO pH=7 (cations), water (anions)	0.6	11.7307	14.6776	0.008	0.0373508	3.99682	3.66274	3.81688
summer	20210803	4	c	8.38	20.34	5.6	2022-09-29	water
summer	20210803	5	a	8.51	14.58	-87.9	2021-10-07	HN4AcO pH=7 (cations), water (anions)	2.60094	7.75893	2.06372	0.004	0.0346469	2.08332	1.96468	2.03759
summer	20210803	5	a	8.51	14.58	-87.9	2022-09-29	water
summer	20210803	5	a	8.51	14.58	-87.9	2023-06-26	EPA 3050b	9.16828	36.2713	14.0172		0.337174	17.4749	16.5522	17.0765
summer	20210803	5	b	8.73	11.73	-24.8	2021-10-07	HN4AcO pH=7 (cations), water (anions)	1.02026	4.93771	0.810881	0.003	0.0257672	1.79294	1.72136	1.7741
summer	20210803	5	b	8.73	11.73	-24.8	2022-09-29	water
summer	20210803	5	b	8.73	11.73	-24.8	2023-06-26	EPA 3050b	7.7389	23.6186	11.9195		0.328638	19.034	17.921	18.5421
summer	20210803	5	c	8.65	16.14	-21.6	2021-10-07	HN4AcO pH=7 (cations), water (anions)	0.840874	3.97644	1.25281	0.003	0.0254693	2.0536	1.93765	2.00303
summer	20210803	5	c	8.65	16.14	-21.6	2022-09-29	water
summer	20210722	6	a	8.71	13.1	-204.3	2021-10-07	HN4AcO pH=7 (cations), water (anions)	23.5031	11.5733	7.97341	0.004	0.14618	21.9071	21.006	21.5692
summer	20210722	6	a	8.71	13.1	-204.3	2022-09-29	water
summer	20210722	6	a	8.71	13.1	-204.3	2023-06-26	EPA 3050b	70.0834	53.0064	31.069		0.187785	44.673	42.5687	43.8248
summer	20210722	6	b	8.45	10.78	-227.8	2021-10-07	HN4AcO pH=7 (cations), water (anions)	5.63579	9.92214	15.7276	0.007	0.121381	8.10669	7.75696	7.9541
summer	20210722	6	b	8.45	10.78	-227.8	2022-09-29	water
summer	20210722	6	b	8.45	10.78	-227.8	2023-06-26	EPA 3050b	15.6079	26.6779	49.1753		0.0992137	22.9626	21.7055	22.5173
summer	20210722	6	c	8.51	11.58	-221	2021-10-07	HN4AcO pH=7 (cations), water (anions)	6.22099	13.7713	46.0654	0.008	0.164903	9.1371	8.72834	8.98901
summer	20210722	6	c	8.51	11.58	-221	2022-09-29	water
summer	20210722	6	a	8.7	18.88	26.5	2021-10-07	HN4AcO pH=7 (cations), water (anions)	2.57377	8.77858	26.179	0.004	0.355265	10.7175	10.1344	10.4649
summer	20210722	6	a	8.7	18.88	26.5	2022-09-29	water
summer	20210722	6	b	8.72	15.75	29.5	2021-10-07	HN4AcO pH=7 (cations), water (anions)	10.8444	18.5548	96.2507	0.0103092	0.467048	25.4851	24.4775	25.1196
summer	20210722	6	b	8.72	15.75	29.5	2022-07-28	HN4AcO pH=7 (cations), water (anions)
summer	20210722	6	c	8.69	18.76	37.2	2021-10-07	HN4AcO pH=7 (cations), water (anions)	7.318	14.7112	118.892	0.008	0.348188	16.0643	15.2739	15.7265
summer	20210722	6	c	8.69	18.76	37.2	2022-09-29	water
summer	20210722	6	a	8.83	11.89	157.9	2021-10-07	HN4AcO pH=7 (cations), water (anions)	3.87082	15.0515	27.7211	0.007	0.513665	29.2534	27.9212	28.6914
summer	20210722	6	a	8.83	11.89	157.9	2022-09-29	water
summer	20210722	6	b	8.77	11.14	149.7	2021-10-07	HN4AcO pH=7 (cations), water (anions)	7.78199	27.5277	47.702	0.008	0.77928	51.1044	48.8828	50.2555
summer	20210722	6	b	8.77	11.14	149.7	2022-09-29	water
summer	20210722	6	c	8.86	11.5	149.1	2021-10-07	HN4AcO pH=7 (cations), water (anions)	5.66076	17.1148	36.5769	0.007	0.696453	41.2842	39.4173	40.532
summer	20210722	6	c	8.86	11.5	149.1	2022-09-29	water
summer	20210722	6	a	8.82	11.51	152.233	2021-10-07	HN4AcO pH=7 (cations), water (anions)	0.3	40.3068	1.89201	0.005	0.00547568	0.549242	0.498195	0.520615
summer	20210722	6	a	8.81833	11.4467	151.289	2022-09-29	water
summer	20210722	6	b	8.76167	14.6533	91.65	2021-10-07	HN4AcO pH=7 (cations), water (anions)	0.4	8.47577	2.73492	0.006	0.0209963	0.624113	0.561588	0.595047
summer	20210722	6	b	8.76167	14.6533	91.65	2022-09-29	water
summer	20210722	6	c	8.76167	14.6533	91.65	2021-10-07	HN4AcO pH=7 (cations), water (anions)	0.5	7.66068	2.75754	0.007	0.00860986	0.720642	0.656336	0.690383
summer	20210722	6	c	8.76167	14.6533	91.65	2022-09-29	water
fall	20211020	1	a	8.55	0.11	63.3	2021-12-06	HN4AcO pH=7 (cations), water (anions)	0.858125	8.28328	0.175275	0.03	0.0237908	6.3429	6.11166	6.26746
fall	20211020	1	a	8.55	0.11	63.3	2022-07-28	water
fall	20211020	1	a	8.55	0.11	63.3	2023-06-26	EPA 3050b	7.65143	48.9261	1.72065		0.146252	25.6303	24.3197	25.1846
fall	20211020	2	a	7.95	0.15	77.7	2021-12-06	HN4AcO pH=7 (cations), water (anions)	0.967821	4.80387	0.964441	0.0271066	0.0321032	17.1003	16.442	16.8068
fall	20211020	2	a	7.95	0.15	77.7	2022-09-29	water
fall	20211020	2	a	7.95	0.15	77.7	2023-06-26	EPA 3050b	27.3347	157.743	8.06008		0.274196	112.925	107.892	111.228
fall	20211020	3	a	8.14	0.18	2.2	2021-12-06	HN4AcO pH=7 (cations), water (anions)	1.24194	12.9239	1.05129	0.03	0.0243919	13.574	12.9426	13.3718
fall	20211020	3	a	8.14	0.18	2.2	2022-07-28	water
fall	20211020	3	a	8.14	0.18	2.2	2023-06-26	EPA 3050b	18.8608	101.005	4.61312		0.210319	66.2963	63.7367	65.2337
fall	20211029	4	a	8.68	16.3	-110.4	2021-12-06	HN4AcO pH=7 (cations), water (anions)	0.449067	2.52857	2.50915	0.0531552	0.01118	1.47295	1.36555	1.43668
fall	20211029	4	a	8.68	16.3	-110.4	2022-09-29	water
fall	20211029	4	a	8.68	16.3	-110.4	2023-06-26	EPA 3050b	18.7426	71.798	34.516		0.500153	13.3098	12.2395	12.8314
fall	20211029	5	a	9.15	6.59	-89.7	2021-12-06	HN4AcO pH=7 (cations), water (anions)	1.24507	2.85322	3.86232	0.05983	0.0285188	2.72516	2.64443	2.67755
fall	20211029	4	a	8.68	16.3	-110.4	2022-07-28	water
fall	20211029	4	a	8.68	16.3	-110.4	2023-06-26	EPA 3050b	63.8283	89.5795	44.2929		0.252592	71.8257	68.8533	70.9343
fall	20211020	6	a	8.76	17.62	-155.8	2021-12-06	HN4AcO pH=7 (cations), water (anions)	0.792874	1.79099	2.5923	0.0854362	0.00866109	2.30863	2.20662	2.2552
fall	20211020	6	a	8.76	17.62	-155.8	2022-09-29	water
fall	20211020	6	a	8.76	17.62	-155.8	2023-06-26	EPA 3050b	22.4016	46.6796	22.4055		0.253989	20.6759	19.5544	20.2111
fall	20211020	1	b	8.4	0.05	78.2	2021-12-06	HN4AcO pH=7 (cations), water (anions)	0.899567	10.6094	0.385633	0.0294992	0.0203195	9.61129	9.15323	9.44624
fall	20211020	1	b	8.4	0.05	78.2	2022-09-29	water
fall	20211020	1	b	8.4	0.05	78.2	2023-06-26	EPA 3050b	9.5271	64.3079	2.01286		0.127973	40.4818	38.4661	39.6554
fall	20211020	2	b	8.37	0.12	69.7	2021-12-06	HN4AcO pH=7 (cations), water (anions)	0.301034	1.90242	0.604158	0.03	0.0175172	2.43052	2.22361	2.34108
fall	20211020	2	b	8.37	0.12	69.7	2022-09-29	water
fall	20211020	2	b	8.37	0.12	69.7	2023-06-26	EPA 3050b	13.2044	59.5405	4.09831		0.170091	23.3256	21.7953	22.6731
fall	20211020	3	b	8.42	0.22	-3.6	2021-12-06	HN4AcO pH=7 (cations), water (anions)	1.50571	10.7538	1.84011	0.03	0.0284073	37.4601	36.1693	37.0673
fall	20211020	3	b	8.42	0.22	-3.6	2022-09-29	water
fall	20211020	3	b	8.42	0.22	-3.6	2023-06-26	EPA 3050b	27.8998	157.333	8.14509		0.211718	116.432	111.452	114.587
fall	20211029	4	b	8.71	11.45	-41.5	2021-12-06	HN4AcO pH=7 (cations), water (anions)	0.640706	3.57754	1.29109	0.0481905	0.0159506	0.431936	0.41684	0.427285
fall	20211029	4	b	8.71	11.45	-41.5	2022-09-29	water
fall	20211029	4	b	8.71	11.45	-41.5	2023-06-26	EPA 3050b	20.5831	295.511	28.276		0.289379	10.5435	9.67394	10.1364
fall	20211029	5	b	8.81	10.2	-174	2021-12-06	HN4AcO pH=7 (cations), water (anions)	0.301097	0.956886	2.7575	0.0357096	0.00276394	0.48187	0.456489	0.47263
fall	20211029	5	b	8.81	10.2	-174	2022-12-01	water
fall	20211029	5	b	8.81	10.2	-174	2023-06-26	EPA 3050b	13.8602	56.9034	18.5488		0.224268	10.2658	9.63659	9.96944
fall	20211020	6	b	8.77	12.8	-118.4	2021-12-06	HN4AcO pH=7 (cations), water (anions)	1.22756	1.20824	12.2953	0.061326	0.0327928	1.30702	1.21436	1.27113
fall	20211020	6	b	8.77	12.8	-118.4	2022-09-29	water
fall	20211020	6	b	8.77	12.8	-118.4	2023-06-26	EPA 3050b	11.8232	29.2438	44.4999		0.298546	14.2446	13.3182	13.8184
fall	20211020	1	c	7.94	0.06	75	2021-12-06	HN4AcO pH=7 (cations), water (anions)	1.92697	20.4453	0.683913	0.03	0.0348854	14.2705	13.6038	13.9318
fall	20211020	1	c	7.94	0.06	75	2022-09-29	water
fall	20211020	2	c	8.14	0.06	76.5	2021-12-06	HN4AcO pH=7 (cations), water (anions)	1.71436	18.0795	0.664645	0.029729	0.0339349	17.667	16.9272	17.3777
fall	20211020	2	c	8.14	0.06	76.5	2022-09-29	water
fall	20211020	3	c	8.87	0.15	-4.4	2021-12-06	HN4AcO pH=7 (cations), water (anions)	1.43189	20.8131	1.62775	0.03	0.0250701	87.8549	84.7926	87.0141
fall	20211020	3	c	8.87	0.15	-4.4	2022-09-29	water
fall	20211029	4	c	8.78	7.75	-17.8	2021-12-06	HN4AcO pH=7 (cations), water (anions)	0.446061	7.02904	2.94092	0.0374313	0.0413538	1.33967	1.22792	1.29237
fall	20211029	4	c	8.78	7.75	-17.8	2022-09-29	water
fall	20211029	5	c	8.87	9	-2.3	2021-12-06	HN4AcO pH=7 (cations), water (anions)	2.65616	2.17343	8.02122	0.03	0.00232872	0.541072	0.49148	0.502909
fall	20211029	5	c	8.87	9	-2.3	2022-09-29	water
fall	20211020	6	c	8.81	10.71	-161.2	2021-12-06	HN4AcO pH=7 (cations), water (anions)	1.46813	2.22943	4.454	0.103201	0.0995275	2.24099	2.1001	2.17361
fall	20211020	6	c	8.81	10.71	-161.2	2022-09-29	water
fall	20211029	4	d	8.73	9.88	-11.9	2021-12-06	HN4AcO pH=7 (cations), water (anions)	0.402702	1.26216	4.16241	0.0406073	0.00983715	1.17303	1.1134	1.14515
fall	20211029	4	d	8.73	9.88	-11.9	2022-09-29	water
fall	20211029	5	d	9.04	7.43	-16.1	2021-12-06	HN4AcO pH=7 (cations), water (anions)	0.609614	1.75959	5.04014	0.0567356	0.0139033	0.69253	0.636249	0.670394
fall	20211029	5	d	9.04	7.43	-16.1	2022-09-29	water
